# Supplementary material for: 2-Pyrrolidinone and Succinimide as Clinical Screening Biomarkers for GABA-Transaminase Deficiency: Anti-seizure Medications Impact Accurate Diagnosis
Source: Front Neurosci. 2019 May 8;13:394. doi: 10.3389/fnins.2019.00394 (PMC6517487; doi:10.3389/fnins.2019.00394)
Supplement: DATA SHEET S1 — Plasma metabolomic data are provided for all plasma samples obtained and analyzed for this study. Z-scores are shown. [file Data_Sheet_1.xlsx]

## Sheet: Plasma metabolomics
	Biochemical	SubPathway	SuperPathway	Patient 2	Patient 1	Patient 1	Patient 1	Patient 3	Patient 4
	N-acetylaspartate (NAA)	Alanine and Aspartate Metabolism	Amino Acid	-1.307	0.712748			-2.39225	-0.877677
	alanine	Alanine and Aspartate Metabolism	Amino Acid	-1.04615	-1.4203	0.407807	-0.608861	0.628454	-0.830352
	N-methylalanine	Alanine and Aspartate Metabolism	Amino Acid	-1.01097	0.0193677
	N-acetylalanine	Alanine and Aspartate Metabolism	Amino Acid	-0.595999	0.546687	-0.461494	0.0814791	-0.226191	-0.220413
	asparagine	Alanine and Aspartate Metabolism	Amino Acid	-0.533107	0.0397265	-1.49271	1.26997	-0.091318	0.999923
	aspartate	Alanine and Aspartate Metabolism	Amino Acid	-0.163662	0.0335449			0.290847	-0.970567
	N-carbamoylalanine	Alanine and Aspartate Metabolism	Amino Acid		0.922841			2.61227
	guanidinoacetate	Creatine Metabolism	Amino Acid	-0.0842953	-0.630566			0.0387044	-1.45667
	creatinine	Creatine Metabolism	Amino Acid	-0.049638	-0.739302	-1.98408	-1.67496	-0.348653	-0.688371
	creatine	Creatine Metabolism	Amino Acid	0.225245	1.04597	0.64026	1.12983	0.785914	-1.01342
	glutamine	Glutamate Metabolism	Amino Acid	0.120054	-0.12032	0.0101447	0.17994	-0.97774	0.755961
	N-acetylglutamate	Glutamate Metabolism	Amino Acid	0.129186	-1.06933			0.0189102	-0.166229
	N-acetylglutamine	Glutamate Metabolism	Amino Acid	0.682596					0.314701
	citramalate	Glutamate Metabolism	Amino Acid	0.7192	0.711001			1.44034
	pyroglutamine	Glutamate Metabolism	Amino Acid	0.776332	-0.995406
	glutamate	Glutamate Metabolism	Amino Acid	0.921957	0.0307823	0.705144	0.856155	0.579187	-0.777063
	N-acetyl-aspartyl-glutamate (NAAG)	Glutamate Metabolism	Amino Acid	0.982166	1.45623			0.55429	1.01389
	2-pyrrolidinone	Glutamate Metabolism	Amino Acid	1.9231	4.7345	6.16	6.88	2.19611	3.58211
	cys-gly, oxidized	Glutathione Metabolism	Amino Acid	-1.67797	-0.229806			1.6578
	cysteinylglycine	Glutathione Metabolism	Amino Acid	-0.747914	0.363317			1.34327
	2-aminobutyrate	Glutathione Metabolism	Amino Acid	0.216378	0.0246156			-1.64508	1.64176
	2-hydroxybutyrate/2-hydroxyisobutyrate	Glutathione Metabolism	Amino Acid	0.258817	0.293695			-1.9378	0.812778
	5-oxoproline	Glutathione Metabolism	Amino Acid	0.661209	0.609296	-0.179407	0.255151	1.50312	-0.409107
	sarcosine	Glycine, Serine and Threonine Metabolism	Amino Acid	-3.78377	0.0674459		0.10608	-1.17381	-1.42179
	glycine	Glycine, Serine and Threonine Metabolism	Amino Acid	0.297043	-0.385079	0.503814	-0.319264	1.7196	0.433215
	N-acetylthreonine	Glycine, Serine and Threonine Metabolism	Amino Acid	0.435145	0.1717			0.552521	-1.59816
	serine	Glycine, Serine and Threonine Metabolism	Amino Acid	0.564895	0.40467	1.31299	1.71608	0.959792	0.906109
	N-acetylserine	Glycine, Serine and Threonine Metabolism	Amino Acid	0.691069	0.0792069			-0.491171	-0.573414
	betaine	Glycine, Serine and Threonine Metabolism	Amino Acid	0.985559	-0.0852147	0.39667	-0.176541	0.409678	-0.843692
	dimethylglycine	Glycine, Serine and Threonine Metabolism	Amino Acid	1.35991	-0.30866	0.800957	0.640569	-0.918637	-0.57811
	threonine	Glycine, Serine and Threonine Metabolism	Amino Acid	1.39576	-0.41105	-0.346523	1.30857	-0.658348	0.515009
	N-acetylglycine	Glycine, Serine and Threonine Metabolism	Amino Acid	3.63472	2.96241			-0.426651	0.176037
	guanidinosuccinate	Guanidino and Acetamido Metabolism	Amino Acid	0.0222221	0.75032				0.672507
	4-guanidinobutanoate	Guanidino and Acetamido Metabolism	Amino Acid	2.94093	4.22797			3.02766	3.02374
	imidazole propionate	Histidine Metabolism	Amino Acid	-1.76884	-0.161523	0.153869	0.280547	-0.702026	0.167693
	3-methylhistidine	Histidine Metabolism	Amino Acid	-1.38136	-1.09791			1.03414	-0.23098
	1-methylimidazoleacetate	Histidine Metabolism	Amino Acid	-1.16973	1.74202	1.24873	-0.0553044	0.186962
	imidazole lactate	Histidine Metabolism	Amino Acid	-1.06594	-1.07773			-0.848631	-0.231219
	4-imidazoleacetate	Histidine Metabolism	Amino Acid	-0.941112	0.530889			0.135828	0.710503
	1-methylhistidine	Histidine Metabolism	Amino Acid	-0.815412	-1.08336	-0.967359	-0.931438	0.178562	-1.29198
	carnosine	Histidine Metabolism	Amino Acid	-0.535085				0.743969
	histidine	Histidine Metabolism	Amino Acid	-0.245134	-0.137549	0.405264	1.19804	-0.423204	1.63816
	hydantoin-5-propionic acid	Histidine Metabolism	Amino Acid	0.334706	-0.659093			-0.393322	-0.31128
	N-acetylhistidine	Histidine Metabolism	Amino Acid	0.587376	1.0493			-0.214924	0.672404
	trans-urocanate	Histidine Metabolism	Amino Acid		-2.61464			-0.388505	-0.944561
	cis-urocanate	Histidine Metabolism	Amino Acid		-1.49353			0.36599	-0.915205
	N-acetyl-1-methylhistidine	Histidine Metabolism	Amino Acid
	3-methyl-2-oxobutyrate	Leucine, Isoleucine and Valine Metabolism	Amino Acid	-2.90644	0.137559			-1.14447	1.33546
	beta-hydroxyisovalerate	Leucine, Isoleucine and Valine Metabolism	Amino Acid	-1.29246	-0.203191	-0.591355	0.535051	-0.695581	-0.648364
	alpha-hydroxyisovalerate	Leucine, Isoleucine and Valine Metabolism	Amino Acid	-1.0482	-0.364241			-0.260241	-0.749713
	valine	Leucine, Isoleucine and Valine Metabolism	Amino Acid	-0.764758	-0.685832	-0.0483552	1.30422	-0.874606	0.588985
	2-hydroxy-3-methylvalerate	Leucine, Isoleucine and Valine Metabolism	Amino Acid	-0.762133	0.807113	-1.14275	-0.544654	-0.65732	-0.583502
	ethylmalonate	Leucine, Isoleucine and Valine Metabolism	Amino Acid	-0.509369	-0.373372	-0.365866	-0.640781	-0.323778	0.809164
	beta-hydroxyisovaleroylcarnitine	Leucine, Isoleucine and Valine Metabolism	Amino Acid	-0.474345	0.485913			-0.763376	0.286865
	isobutyrylglycine	Leucine, Isoleucine and Valine Metabolism	Amino Acid	-0.41601	-0.431563
	leucine	Leucine, Isoleucine and Valine Metabolism	Amino Acid	-0.39932	-0.346772	-0.110223	1.99716	-0.517865	0.248994
	3-methylglutaconate	Leucine, Isoleucine and Valine Metabolism	Amino Acid	-0.296286	-0.482049			-0.597841	-0.0600296
	4-methyl-2-oxopentanoate	Leucine, Isoleucine and Valine Metabolism	Amino Acid	-0.190298	0.828572			-1.46622	0.840164
	3-methylglutarylcarnitine (2)	Leucine, Isoleucine and Valine Metabolism	Amino Acid	-0.161007	0.0239325			0.527645	0.373142
	alpha-hydroxyisocaproate	Leucine, Isoleucine and Valine Metabolism	Amino Acid	-0.102487	0.202292			-0.336835	-0.488826
	3-hydroxyisobutyrate	Leucine, Isoleucine and Valine Metabolism	Amino Acid	-0.0110291	1.56208	-0.236895	0.463595	-1.24733	0.550334
	N-acetylvaline	Leucine, Isoleucine and Valine Metabolism	Amino Acid	0.0447095	-0.694911	-0.073989	0.615925	-0.243661	-1.47576
	isoleucine	Leucine, Isoleucine and Valine Metabolism	Amino Acid	0.0493761	-0.0664959	0.175724	1.49024	-0.40795	0.0817523
	3-hydroxy-2-ethylpropionate	Leucine, Isoleucine and Valine Metabolism	Amino Acid	0.0581352	0.449488		-1.02804	-1.39642	-0.33709
	3-methyl-2-oxovalerate	Leucine, Isoleucine and Valine Metabolism	Amino Acid	0.059782	1.17738			-0.80043	0.497859
	tiglylcarnitine (C5:1-DC)	Leucine, Isoleucine and Valine Metabolism	Amino Acid	0.0659641	-0.937658
	N-acetylisoleucine	Leucine, Isoleucine and Valine Metabolism	Amino Acid	0.136596	-0.698151			0.922909	-1.50355
	2-methylbutyrylglycine	Leucine, Isoleucine and Valine Metabolism	Amino Acid	0.221419	0.0798441
	N-acetylleucine	Leucine, Isoleucine and Valine Metabolism	Amino Acid	0.354414	-0.671218	-0.482603	1.20475	-0.493574	-1.40882
	methylsuccinate	Leucine, Isoleucine and Valine Metabolism	Amino Acid	0.365749	-0.669746			-0.64554	-0.66659
	isobutyrylcarnitine (C4)	Leucine, Isoleucine and Valine Metabolism	Amino Acid	0.544315	0.534212			-0.259091	-0.437635
	isovalerylcarnitine (C5)	Leucine, Isoleucine and Valine Metabolism	Amino Acid	0.565377	-0.929019			-0.912531	-0.890743
	isovalerylglycine	Leucine, Isoleucine and Valine Metabolism	Amino Acid	1.05407				1.08075	-0.296142
	2-methylbutyrylcarnitine (C5)	Leucine, Isoleucine and Valine Metabolism	Amino Acid	1.38661	0.32631	-0.131889	-0.105531
	isovalerate	Leucine, Isoleucine and Valine Metabolism	Amino Acid	1.68514	-0.146391
	N6,N6,N6-trimethyllysine	Lysine Metabolism	Amino Acid	-0.564553	-0.455131	-1.42305	-1.06283	-0.419651	-1.65882
	5-hydroxylysine	Lysine Metabolism	Amino Acid	-0.306906	0.204359			-0.01507	-0.98153
	glutarylcarnitine (C5-DC)	Lysine Metabolism	Amino Acid	0.0816486	-0.100094		-0.594893
	pipecolate	Lysine Metabolism	Amino Acid	0.159224	0.24458	0.00976286	-0.666091	-1.31611	-0.990837
	6-oxopiperidine-2-carboxylate	Lysine Metabolism	Amino Acid	0.431651	-0.45585	0.676134	-0.464684	-0.562415	-0.273389
	N6-acetyllysine	Lysine Metabolism	Amino Acid	0.556054	0.640159			-0.262173	-0.39994
	lysine	Lysine Metabolism	Amino Acid	0.679169	-0.333859	0.625293	1.55155	-1.30951	-0.339528
	2-aminoadipate	Lysine Metabolism	Amino Acid	0.705683	-0.711967			-1.87535	0.464781
	cysteine s-sulfate	Methionine, Cysteine, SAM and Taurine Metabolism	Amino Acid	-1.22616	0.26321			0.494264	0.458782
	N-formylmethionine	Methionine, Cysteine, SAM and Taurine Metabolism	Amino Acid	-1.03537	0.158795	-0.0148931	0.58576	-0.504659	-0.487606
	cystathionine	Methionine, Cysteine, SAM and Taurine Metabolism	Amino Acid	-0.726503	0.104372
	S-methylcysteine	Methionine, Cysteine, SAM and Taurine Metabolism	Amino Acid	-0.645315	-0.0902997			-0.414417	-0.339492
	methionine	Methionine, Cysteine, SAM and Taurine Metabolism	Amino Acid	-0.623931	-0.744058	1.90463	1.52652	-1.15074	-0.392208
	alpha-ketobutyrate	Methionine, Cysteine, SAM and Taurine Metabolism	Amino Acid	-0.491191				-2.93599	0.126191
	cysteine	Methionine, Cysteine, SAM and Taurine Metabolism	Amino Acid	-0.343042	-0.675691	-0.480568	0.205307	1.13554	0.984063
	methionine sulfoxide	Methionine, Cysteine, SAM and Taurine Metabolism	Amino Acid	-0.199607	-0.32514			-0.105732	-0.428566
	N-acetyltaurine	Methionine, Cysteine, SAM and Taurine Metabolism	Amino Acid	0.0153089	0.314925	0.00121107	0.287608	0.689143	0.270428
	S-adenosylhomocysteine (SAH)	Methionine, Cysteine, SAM and Taurine Metabolism	Amino Acid	0.0327819	-0.469666		1.09106	1.13283
	N-acetylmethionine	Methionine, Cysteine, SAM and Taurine Metabolism	Amino Acid	0.17211	-0.818485	6.65005	2.64354	-0.187585	-0.436179
	taurine	Methionine, Cysteine, SAM and Taurine Metabolism	Amino Acid	0.287325	0.475616	0.84488	-0.0669384	0.924414	-0.548508
	cysteine sulfinic acid	Methionine, Cysteine, SAM and Taurine Metabolism	Amino Acid	0.291687	0.422068				-0.641949
	methionine sulfone	Methionine, Cysteine, SAM and Taurine Metabolism	Amino Acid	0.533226	-0.830849	-1.96584	-0.56299	-0.0739178	-1.6197
	hypotaurine	Methionine, Cysteine, SAM and Taurine Metabolism	Amino Acid	0.628477	0.122376			0.743841	-0.196217
	cystine	Methionine, Cysteine, SAM and Taurine Metabolism	Amino Acid	1.588					1.1255
	phenylpyruvate	Phenylalanine Metabolism	Amino Acid	-1.44287	-0.667787	1.70548	0.697588	0.81489	-0.801083
	N-acetylphenylalanine	Phenylalanine Metabolism	Amino Acid	-1.38317	-0.481676			-0.727253	-1.15902
	phenyllactate (PLA)	Phenylalanine Metabolism	Amino Acid	-1.16368	0.213326			-0.318217	-1.22408
	phenylalanine	Phenylalanine Metabolism	Amino Acid	-0.673287	-0.687948	1.2603	1.28575	0.437787	-0.331957
	4-hydroxyphenylacetate	Phenylalanine Metabolism	Amino Acid	0.0648508					-0.245216
	spermidine	Polyamine Metabolism	Amino Acid	-1.40404	-0.205185	0.906332	1.01173	-1.75717	-0.18987
	4-acetamidobutanoate	Polyamine Metabolism	Amino Acid	-0.176314	0.831329			0.385419	-0.0677214
	acisoga	Polyamine Metabolism	Amino Acid	-0.00155069	0.924449			-0.0343122	-1.67323
	N-acetylputrescine	Polyamine Metabolism	Amino Acid	0.0972459	0.0401229			-0.195712	-0.672948
	5-methylthioadenosine (MTA)	Polyamine Metabolism	Amino Acid		-0.11651				-0.450784
	kynurenate	Tryptophan Metabolism	Amino Acid	-2.02312	-0.327188	1.21223	0.225702	-0.360448	-1.20541
	picolinate	Tryptophan Metabolism	Amino Acid	-0.692591	-0.672969			-1.36427	0.5679
	N-acetyltryptophan	Tryptophan Metabolism	Amino Acid	-0.59639	-0.104738			0.638624	-1.32233
	indolelactate	Tryptophan Metabolism	Amino Acid	-0.555337	1.08547			-0.0636687	-0.880803
	kynurenine	Tryptophan Metabolism	Amino Acid	-0.547324	0.217526			-0.53032	-1.24081
	indolepropionate	Tryptophan Metabolism	Amino Acid	-0.452624	0.312564			0.955093	-1.80376
	C-glycosyltryptophan	Tryptophan Metabolism	Amino Acid	-0.0308508	-0.661852			0.347114	-0.0929358
	anthranilate	Tryptophan Metabolism	Amino Acid	0.163409
	indoleacetate	Tryptophan Metabolism	Amino Acid	0.295369	-0.604191			0.176277	0.188917
	tryptophan	Tryptophan Metabolism	Amino Acid	0.525842	-0.267706	0.255201	1.74798	0.371632	0.798303
	3-indoxyl sulfate	Tryptophan Metabolism	Amino Acid	0.752427	0.98474			0.468834	-0.555164
	serotonin	Tryptophan Metabolism	Amino Acid		0.476361				-0.486764
	tryptophan betaine	Tryptophan Metabolism	Amino Acid		-0.833477				-1.15706
	indoleacetylglutamine	Tryptophan Metabolism	Amino Acid
	indole-3-carboxylic acid	Tryptophan Metabolism	Amino Acid		0.883653			0.369339
	xanthurenate	Tryptophan Metabolism	Amino Acid		-0.0708343			-1.2913	-0.313312
	5-hydroxyindoleacetate	Tryptophan Metabolism	Amino Acid		1.71231
	4-hydroxyphenylpyruvate	Tyrosine Metabolism	Amino Acid	-0.765451	-0.881775	0.809435	1.84377	0.117391	-0.825443
	N-formylphenylalanine	Tyrosine Metabolism	Amino Acid	-0.668855				-0.0787826	1.12615
	3-(4-hydroxyphenyl)lactate	Tyrosine Metabolism	Amino Acid	-0.648336	-1.11075	-0.533191	-0.283859
	dopamine 3-O-sulfate	Tyrosine Metabolism	Amino Acid	-0.388196	-0.789042				0.396644
	phenol sulfate	Tyrosine Metabolism	Amino Acid	-0.158242	3.81022			0.265103	-0.450078
	vanillylmandelate (VMA)	Tyrosine Metabolism	Amino Acid	-0.0711246	-0.984541	-0.369319	0.186019	-0.054658	0.881528
	N-acetyltyrosine	Tyrosine Metabolism	Amino Acid	0.426144	-1.30159			0.206104
	thyroxine	Tyrosine Metabolism	Amino Acid	0.54056	-0.17164	0.762793	-1.43736	0.0714368	-0.386833
	p-cresol-glucuronide	Tyrosine Metabolism	Amino Acid	0.623458	-0.814336
	tyramine O-sulfate	Tyrosine Metabolism	Amino Acid	0.625043	-0.215113			0.267695	-0.299379
	3-methoxytyrosine	Tyrosine Metabolism	Amino Acid	0.739499	-0.199055	1.42948	0.580259	-0.282476	0.223421
	tyrosine	Tyrosine Metabolism	Amino Acid	1.109	-0.498776	0.529763	1.46122	-0.47018	0.156005
	vanillic alcohol sulfate	Tyrosine Metabolism	Amino Acid	1.42481	-0.266239			-0.203788	0.567289
	3-methoxytyramine sulfate	Tyrosine Metabolism	Amino Acid		-0.102888			-0.952573
	N-methylproline	Urea cycle; Arginine and Proline Metabolism	Amino Acid	-1.29738	-0.51033			-0.752758	-1.51764
	N-acetylarginine	Urea cycle; Arginine and Proline Metabolism	Amino Acid	-1.1991	-0.39607			0.166045	-0.331074
	urea	Urea cycle; Arginine and Proline Metabolism	Amino Acid	-1.0437	0.268948	0.213266	0.41238	-0.141438	0.458325
	ornithine	Urea cycle; Arginine and Proline Metabolism	Amino Acid	-1.02447	0.999973	1.26919	0.211741	1.12005	-0.591086
	arginine	Urea cycle; Arginine and Proline Metabolism	Amino Acid	-0.604858	-1.22209	2.02284	0.551861	-1.41688	0.122976
	trans-4-hydroxyproline	Urea cycle; Arginine and Proline Metabolism	Amino Acid	-0.456001	-1.95008	0.920406	0.115653
	dimethylarginine (SDMA + ADMA)	Urea cycle; Arginine and Proline Metabolism	Amino Acid	-0.421918	0.483107	1.04037	0.576856
	citrulline	Urea cycle; Arginine and Proline Metabolism	Amino Acid	-0.308669	-0.00730873	-0.330192	0.296511	0.171316	0.970292
	proline	Urea cycle; Arginine and Proline Metabolism	Amino Acid	-0.260386	-1.31146	0.68885	0.417091	0.275186	0.847628
	homoarginine	Urea cycle; Arginine and Proline Metabolism	Amino Acid	-0.144337	-1.77356			-1.48467	-1.42588
	N-acetylcitrulline	Urea cycle; Arginine and Proline Metabolism	Amino Acid	-0.0589945				0.179728	0.23993
	argininosuccinate	Urea cycle; Arginine and Proline Metabolism	Amino Acid	0.0534838
	pro-hydroxy-pro	Urea cycle; Arginine and Proline Metabolism	Amino Acid	0.266714	-0.140524
	N-delta-acetylornithine	Urea cycle; Arginine and Proline Metabolism	Amino Acid	0.373397	-0.780142	0.445552	0.452515	0.294128	-0.634766
	homocitrulline	Urea cycle; Arginine and Proline Metabolism	Amino Acid	1.16476	-0.266623			0.438167	2.00541
	N6-carboxymethyllysine	Advanced Glycation End-product	Carbohydrate	1.22191				0.580264	1.10042
	erythronate	Aminosugar Metabolism	Carbohydrate	-0.205861	0.5689
	N-acetylneuraminate	Aminosugar Metabolism	Carbohydrate	0.46911	0.610198	0.775316	-0.362163	0.279811	-0.100989
	glucuronate	Aminosugar Metabolism	Carbohydrate	0.62076	0.264344			-0.517906	-0.893613
	N-acetylglucosamine/N-acetylgalactosamine	Aminosugar Metabolism	Carbohydrate		-0.0402261			0.730978	-0.747773
	sucrose	Disaccharides and Oligosaccharides	Carbohydrate	0.482495	0.39291		0.603601	1.16643
	lactose	Disaccharides and Oligosaccharides	Carbohydrate					-0.256879
	fructose	Fructose, Mannose and Galactose Metabolism	Carbohydrate	-0.242286	-0.975797	1.46388	0.515836	1.11228	-0.0599358
	mannitol/sorbitol	Fructose, Mannose and Galactose Metabolism	Carbohydrate	0.847383	-1.02337			0.153937	-1.20491
	mannose	Fructose, Mannose and Galactose Metabolism	Carbohydrate	1.78226	-1.19231	-3.43128	-0.853632	-2.60312	-0.23271
	galactonate	Fructose, Mannose and Galactose Metabolism	Carbohydrate		0.618651			0.503754
	maltose	Glycogen Metabolism	Carbohydrate	0.496145			0.219042	1.14382	-0.438898
	pyruvate	Glycolysis, Gluconeogenesis, and Pyruvate Metabolism	Carbohydrate	-2.49447	0.159643	-0.0056596	-0.498054	1.42408	-1.87108
	lactate	Glycolysis, Gluconeogenesis, and Pyruvate Metabolism	Carbohydrate	-0.822331	1.16812	0.771155	0.0776666	1.9009	-0.749911
	glucose	Glycolysis, Gluconeogenesis, and Pyruvate Metabolism	Carbohydrate	-0.620897	-1.70409	-0.321736	1.24671	-1.92335	-0.782901
	1,5-anhydroglucitol (1,5-AG)	Glycolysis, Gluconeogenesis, and Pyruvate Metabolism	Carbohydrate	-0.385109	-1.79309	-0.534738	-0.178726	1.47132	1.45575
	glycerate	Glycolysis, Gluconeogenesis, and Pyruvate Metabolism	Carbohydrate	-0.326448	0.428679	2.24449	0.656251	0.378434	-0.375423
	3-phosphoglycerate	Glycolysis, Gluconeogenesis, and Pyruvate Metabolism	Carbohydrate		-0.151043			1.04805	0.0357719
	2,3-diphosphoglycerate	Glycolysis, Gluconeogenesis, and Pyruvate Metabolism	Carbohydrate					-0.75573
	ribitol	Pentose Metabolism	Carbohydrate	-1.10244	-0.281377			0.245222	-1.08855
	ribonate	Pentose Metabolism	Carbohydrate	-0.560384	0.632625
	arabonate/xylonate	Pentose Metabolism	Carbohydrate	-0.504684	0.13428			1.01435	-0.822442
	arabitol/xylitol	Pentose Metabolism	Carbohydrate	0.0465863	-0.254104			0.271185	-1.3299
	ribose	Pentose Metabolism	Carbohydrate	1.90198
	gulonate	Ascorbate and Aldarate Metabolism	Cofactors and Vitamins	0.246544	-0.465786
	threonate	Ascorbate and Aldarate Metabolism	Cofactors and Vitamins	1.94592	0.279347			1.17675	1.05227
	oxalate (ethanedioate)	Ascorbate and Aldarate Metabolism	Cofactors and Vitamins	2.1834	-0.185287			0.396367	1.56598
	biliverdin	Hemoglobin and Porphyrin Metabolism	Cofactors and Vitamins	-0.984951	-0.740221			-0.520746	-0.528545
	heme	Hemoglobin and Porphyrin Metabolism	Cofactors and Vitamins	1.03408	-0.585743			0.208233	-1.29238
	1-methylnicotinamide	Nicotinate and Nicotinamide Metabolism	Cofactors and Vitamins	-1.48831	-0.332578			0.325707	-1.34517
	trigonelline (N'-methylnicotinate)	Nicotinate and Nicotinamide Metabolism	Cofactors and Vitamins	-1.15464	-0.193528			0.709723
	nicotinamide	Nicotinate and Nicotinamide Metabolism	Cofactors and Vitamins	-0.580061	0.347815	0.976269	1.16174	0.387779	-1.26879
	quinolinate	Nicotinate and Nicotinamide Metabolism	Cofactors and Vitamins	-0.370888	-0.0572816			-0.75766	-1.12611
	N1-Methyl-2-pyridone-5-carboxamide	Nicotinate and Nicotinamide Metabolism	Cofactors and Vitamins	0.0906936	-0.269913			1.04873	-0.802202
	pantothenate	Pantothenate and CoA Metabolism	Cofactors and Vitamins	0.963284	0.496269	0.38914	1.415
	riboflavin (Vitamin B2)	Riboflavin Metabolism	Cofactors and Vitamins	0.406237
	alpha-CEHC sulfate	Tocopherol Metabolism	Cofactors and Vitamins	0.756853	0.351766				0.728146
	gamma-CEHC glucuronide	Tocopherol Metabolism	Cofactors and Vitamins	1.14634	-0.79916
	alpha-tocopherol	Tocopherol Metabolism	Cofactors and Vitamins	1.61524	-0.906537				2.64042
	gamma-CEHC	Tocopherol Metabolism	Cofactors and Vitamins	2.07734	0.212371	-0.78114	1.39458	0.0773279	0.997841
	retinol (Vitamin A)	Vitamin A Metabolism	Cofactors and Vitamins	0.567307	-0.914616			-0.355884	-0.227957
	pyridoxate	Vitamin B6 Metabolism	Cofactors and Vitamins	0.783287	-0.184909			0.881238	0.595951
	pyridoxal	Vitamin B6 Metabolism	Cofactors and Vitamins	1.44475	-0.458019			0.00771936	0.0840694
	phosphate	Oxidative Phosphorylation	Energy	-0.292902	0.408821	1.18099	0.390109	0.629634	-1.06388
	citrate	TCA Cycle	Energy	-5.62076	-0.612653	-0.534852	0.0383411	0.0937964	-0.637934
	succinylcarnitine (C4-DC)	TCA Cycle	Energy	-1.33495	-0.21303
	alpha-ketoglutarate	TCA Cycle	Energy	-0.733468	0.898373	-0.812196	-0.109638	-0.424246	-1.11744
	malate	TCA Cycle	Energy	-0.670211	0.125983			0.193927	-1.15052
	fumarate	TCA Cycle	Energy	-0.352941	1.32781	-0.689012	-1.14859	0.574878	-1.39463
	succinate	TCA Cycle	Energy	0.769115	0.398296	0.733598	-0.442545	1.65164	-0.508328
	aconitate [cis or trans]	TCA Cycle	Energy	5.21161	-6.57692			0.0121419	-1.16832
	2-methylcitrate	TCA Cycle	Energy					-0.707852	1.34765
	5alpha-androstan-3beta,17beta-diol disulfate	Androgenic Steroids	Lipid	0.273857		-1.69182	-1.52412	0.463882	0.895092
	androsterone sulfate	Androgenic Steroids	Lipid	0.418052	-0.893744			0.736785	1.00314
	androstenediol (3alpha, 17alpha) monosulfate (3)	Androgenic Steroids	Lipid	0.4576					1.00819
	epiandrosterone sulfate	Androgenic Steroids	Lipid	0.558588				0.88656	0.822216
	androstenediol (3beta,17beta) disulfate (2)	Androgenic Steroids	Lipid	0.803073	-0.662174	-0.97459	-0.996565		0.287417
	androstenediol (3beta,17beta) disulfate (1)	Androgenic Steroids	Lipid	0.804081	-0.887423	-1.57994	-1.54951		0.541375
	androstenediol (3beta,17beta) monosulfate (1)	Androgenic Steroids	Lipid	0.840003					0.34335
	dehydroisoandrosterone sulfate (DHEA-S)	Androgenic Steroids	Lipid	1.07232	-0.616732			0.33929	0.512039
	16a-hydroxy DHEA 3-sulfate	Androgenic Steroids	Lipid	1.27957	0.228781	0.160415	0.0235641	-0.288152	-0.126435
	deoxycarnitine	Carnitine Metabolism	Lipid	-0.688964	-0.566909	-1.3301	-1.70104	-0.401926	-0.992764
	carnitine	Carnitine Metabolism	Lipid	1.69299	0.654185			-1.56815	-0.72447
	N-palmitoyl-sphingosine (d18:1/16:0)	Ceramides	Lipid	-0.498708	0.136481			0.0775649	-0.473505
	lactosyl-N-palmitoyl-sphingosine (d18:1/16:0)	Ceramides	Lipid	1.52784	-1.03551			0.050777	0.868641
	cortisone	Corticosteroids	Lipid	-0.335006	1.16556	-0.0987294	0.554228	0.710994	0.1531
	cortisol	Corticosteroids	Lipid	-0.259967	1.64515	-0.0091941	0.698	0.157191	-0.452879
	palmitoyl-linoleoyl-glycerol (16:0/18:2) [1]	Diacylglycerol	Lipid	-4.82766	0.944865
	palmitoyl-linoleoyl-glycerol (16:0/18:2) [2]	Diacylglycerol	Lipid	0.314999	-0.814742
	oleoyl-linoleoyl-glycerol (18:1/18:2) [2]	Diacylglycerol	Lipid	0.452836	0.0937636			1.80909	-1.00649
	oleoyl-linoleoyl-glycerol (18:1/18:2) [1]	Diacylglycerol	Lipid	0.793173	0.9151			1.82092	-0.154933
	palmitoleoyl-oleoyl-glycerol (16:1/18:1) [1]	Diacylglycerol	Lipid		1.55549
	palmitoleoyl-oleoyl-glycerol (16:1/18:1) [2]	Diacylglycerol	Lipid		1.66666
	palmitoyl ethanolamide	Endocannabinoid	Lipid	-1.07891	1.31956	-0.819315	0.955147	1.52496	2.58718
	stearoyl ethanolamide	Endocannabinoid	Lipid	-0.562082	-0.409415			1.98577	1.40347
	oleoyl ethanolamide	Endocannabinoid	Lipid	-0.0675702	1.81255	0.182481	0.60742	0.258724	1.91782
	N-oleoyltaurine	Endocannabinoid	Lipid	0.343611				-0.80468	1.3642
	N-palmitoyltaurine	Endocannabinoid	Lipid		1.77408			1.29384
	palmitoylcholine	Fatty Acid Metabolism (Acyl Choline)	Lipid	1.47651	1.45216			0.694474	0.985043
	methylmalonate (MMA)	Fatty Acid Metabolism (also BCAA Metabolism)	Lipid	-0.267736	0.770816		1.0572	0.908499	-0.590657
	propionylglycine	Fatty Acid Metabolism (also BCAA Metabolism)	Lipid	0.0255581	1.06989
	butyrylcarnitine (C4)	Fatty Acid Metabolism (also BCAA Metabolism)	Lipid	0.151069	-0.0937522			-0.177488	0.293238
	propionylcarnitine (C3)	Fatty Acid Metabolism (also BCAA Metabolism)	Lipid	0.826016	0.568314			-1.51175	-0.665476
	myristoylcarnitine (C14)	Fatty Acid Metabolism(Acyl Carnitine)	Lipid	-1.39777	1.8378				-1.77644
	laurylcarnitine (C12)	Fatty Acid Metabolism(Acyl Carnitine)	Lipid	-1.34352	0.768679			-2.2424	-0.6134
	palmitoylcarnitine (C16)	Fatty Acid Metabolism(Acyl Carnitine)	Lipid	-1.058	1.9455			-0.488064	-2.0686
	decanoylcarnitine (C10)	Fatty Acid Metabolism(Acyl Carnitine)	Lipid	-0.844745	0.9009			-2.55207	0.0911288
	octanoylcarnitine (C8)	Fatty Acid Metabolism(Acyl Carnitine)	Lipid	-0.380532	0.778393			-2.36575	-0.042437
	oleoylcarnitine (C18:1)	Fatty Acid Metabolism(Acyl Carnitine)	Lipid	0.0384533	2.71029
	myristoleoylcarnitine (C14:1)	Fatty Acid Metabolism(Acyl Carnitine)	Lipid	0.0665605	0.899317	-1.08194	-0.390885
	cis-4-decenoylcarnitine (C10:1)	Fatty Acid Metabolism(Acyl Carnitine)	Lipid	0.073184	0.0266389	-0.976337	-0.315658		0.712054
	3-hydroxybutyrylcarnitine (1)	Fatty Acid Metabolism(Acyl Carnitine)	Lipid	0.384175	0.616653	-0.407709	-0.00906424	-1.70618	0.538183
	suberoylcarnitine (C8-DC)	Fatty Acid Metabolism(Acyl Carnitine)	Lipid	0.430028	0.231254				0.130239
	3-hydroxybutyrylcarnitine (2)	Fatty Acid Metabolism(Acyl Carnitine)	Lipid	0.482673	-0.319951			-0.220441	0.776797
	stearoylcarnitine (C18)	Fatty Acid Metabolism(Acyl Carnitine)	Lipid	0.99599	1.64032			-0.16395	-1.45123
	hexanoylcarnitine (C6)	Fatty Acid Metabolism(Acyl Carnitine)	Lipid	1.06677	1.10135			-1.87545	-0.416976
	acetylcarnitine (C2)	Fatty Acid Metabolism(Acyl Carnitine)	Lipid	1.15089	0.665096			-0.878511	0.516864
	linoleoylcarnitine (C18:2)	Fatty Acid Metabolism(Acyl Carnitine)	Lipid	1.49339	1.82881	-1.16822	-0.443222
	N-palmitoylglycine	Fatty Acid Metabolism(Acyl Glycine)	Lipid	-0.454261	0.723979	0.0917747	0.325788	1.05382	1.16477
	hexanoylglycine	Fatty Acid Metabolism(Acyl Glycine)	Lipid	1.3612	0.888195
	N-linoleoylglycine	Fatty Acid Metabolism(Acyl Glycine)	Lipid	1.429					1.16357
	2-methylmalonylcarnitine (C4-DC)	Fatty Acid Synthesis	Lipid	0.365749	0.229128
	malonate	Fatty Acid Synthesis	Lipid	2.16435	-0.124597				-1.10168
	oleamide	Fatty Acid, Amide	Lipid	-1.0381	1.90232			1.34991	-0.403561
	palmitic amide	Fatty Acid, Amide	Lipid	-0.719662	1.91175			1.54284
	linoleamide (18:2n6)	Fatty Acid, Amide	Lipid		2.2443			1.05414	-0.18448
	2-aminoheptanoate	Fatty Acid, Amino	Lipid	-1.29253	0.0556776			-0.225992	-1.53188
	2-aminooctanoate	Fatty Acid, Amino	Lipid		-0.47702			0.460288	0.753081
	15-methylpalmitate	Fatty Acid, Branched	Lipid	-0.906482	1.58472	-1.41536	-0.464817
	17-methylstearate	Fatty Acid, Branched	Lipid	-0.716701	1.63614	-1.40904	0.192085	-0.487855
	3-carboxy-4-methyl-5-propyl-2-furanpropanoate (CMPF)	Fatty Acid, Dicarboxylate	Lipid	-1.1977	0.446913		0.244274	-0.216588	-0.452587
	hexadecanedioate	Fatty Acid, Dicarboxylate	Lipid	-1.05306	0.257965
	tetradecanedioate	Fatty Acid, Dicarboxylate	Lipid	-0.922859	0.807528
	dodecanedioate	Fatty Acid, Dicarboxylate	Lipid	-0.73175
	2-hydroxyglutarate	Fatty Acid, Dicarboxylate	Lipid	-0.509419	0.130372	-0.132243	-1.56734	1.21914	-1.28401
	eicosanodioate	Fatty Acid, Dicarboxylate	Lipid	-0.424318	-0.714446	-0.157423	0.0143691	-0.312384
	docosadioate	Fatty Acid, Dicarboxylate	Lipid	-0.407366	0.356763			0.00332632
	glutarate (pentanedioate)	Fatty Acid, Dicarboxylate	Lipid	-0.119182	1.27598	-1.40084		-0.633289
	azelate (nonanedioate)	Fatty Acid, Dicarboxylate	Lipid	-0.114881	-1.31314	-0.341532	0.667451
	suberate (octanedioate)	Fatty Acid, Dicarboxylate	Lipid	-0.0657136				0.117296
	octadecanedioate	Fatty Acid, Dicarboxylate	Lipid	0.129352	0.0979657
	2-hydroxyadipate	Fatty Acid, Dicarboxylate	Lipid	0.326547
	maleate	Fatty Acid, Dicarboxylate	Lipid	0.677863	0.278046			-0.347795	-0.351167
	sebacate (decanedioate)	Fatty Acid, Dicarboxylate	Lipid	0.98199	-0.157403			-0.302949
	pimelate (heptanedioate)	Fatty Acid, Dicarboxylate	Lipid		0.59651			-0.632066
	3-methyladipate	Fatty Acid, Dicarboxylate	Lipid		1.14636
	adipate	Fatty Acid, Dicarboxylate	Lipid		-0.228936			-0.531532
	9,10-DiHOME	Fatty Acid, Dihydroxy	Lipid	-0.391288	-0.0459553	-0.19455	0.78487	1.23222	0.116164
	2-hydroxydecanoate	Fatty Acid, Monohydroxy	Lipid	-1.54836	-0.0741336	0.478379	0.724183	0.120482	-0.113778
	3-hydroxylaurate	Fatty Acid, Monohydroxy	Lipid	-1.13714	0.130512			-0.856413	-0.403285
	13-HODE + 9-HODE	Fatty Acid, Monohydroxy	Lipid	-0.872481	0.804114			0.783277	0.781317
	2-hydroxyoctanoate	Fatty Acid, Monohydroxy	Lipid	-0.836709				-0.165262	-0.0993989
	3-hydroxyoctanoate	Fatty Acid, Monohydroxy	Lipid	-0.582148	-0.580347			-0.184475	-0.83217
	5-hydroxyhexanoate	Fatty Acid, Monohydroxy	Lipid	-0.520029					-0.585648
	9-hydroxystearate	Fatty Acid, Monohydroxy	Lipid	-0.463652	0.0358723			-0.768756	-0.202863
	3-hydroxydecanoate	Fatty Acid, Monohydroxy	Lipid	-0.447393	-0.283267			-0.496731	-0.887355
	3-hydroxysebacate	Fatty Acid, Monohydroxy	Lipid	-0.197979	0.240954			0.271121	-0.105339
	16-hydroxypalmitate	Fatty Acid, Monohydroxy	Lipid	0.0546811	0.586176	-1.48734	-0.441025	-0.77552	-0.187384
	2-hydroxypalmitate	Fatty Acid, Monohydroxy	Lipid	2.75205	1.42534	-0.481961	0.322177	-0.160896	1.32644
	2-hydroxystearate	Fatty Acid, Monohydroxy	Lipid	3.21008	1.69595	0.330353	0.136381	0.412721	2.16169
	alpha-hydroxycaproate	Fatty Acid, Monohydroxy	Lipid		1.16024			-0.772952
	8-hydroxyoctanoate	Fatty Acid, Monohydroxy	Lipid		-0.108957			2.61086
	glycerophosphoglycerol	Glycerolipid Metabolism	Lipid	-0.51846				1.43796	-1.04584
	glycerol	Glycerolipid Metabolism	Lipid	-0.430761	-0.460688	-0.237673	0.129247	-1.37592	-0.0825273
	glycerol 3-phosphate	Glycerolipid Metabolism	Lipid	0.928055	-0.434544			-2.80213	0.242796
	myo-inositol	Inositol Metabolism	Lipid	-0.0433386	0.356863	0.547375	0.0704546	0.620793	0.249845
	chiro-inositol	Inositol Metabolism	Lipid		0.954884			-0.5363
	3-hydroxybutyrate (BHBA)	Ketone Bodies	Lipid	0.728303	1.4469	0.0131347	0.431353	-1.14448	0.946977
	myristate (14:0)	Long Chain Fatty Acid	Lipid	-0.938312	1.5615	-0.601293	0.0851546	-0.851518	-0.418281
	palmitoleate (16:1n7)	Long Chain Fatty Acid	Lipid	-0.731513	1.20006	-1.79919	0.20945	-0.396758	0.401283
	10-heptadecenoate (17:1n7)	Long Chain Fatty Acid	Lipid	-0.627493	1.71059	-1.75307	0.0148632	-0.275989	0.216204
	myristoleate (14:1n5)	Long Chain Fatty Acid	Lipid	-0.380066	1.01521			-0.929254	-0.261573
	10-nonadecenoate (19:1n9)	Long Chain Fatty Acid	Lipid	0.0390718	1.72871	-1.15381	0.211894	-0.631824	0.415326
	oleate/vaccenate (18:1)	Long Chain Fatty Acid	Lipid	0.0521129	1.40512			-0.500254	1.38337
	palmitate (16:0)	Long Chain Fatty Acid	Lipid	0.158065	1.26671	-1.53379	-0.250513	-0.292637	0.654918
	erucate (22:1n9)	Long Chain Fatty Acid	Lipid	0.290512	1.61432		-0.192641	-0.640473	2.49661
	margarate (17:0)	Long Chain Fatty Acid	Lipid	0.540411	1.73358	-1.46985	-0.0737397	-0.531187	0.755759
	eicosenoate (20:1)	Long Chain Fatty Acid	Lipid	0.875931	1.4003
	stearate (18:0)	Long Chain Fatty Acid	Lipid	1.2019	1.30116	-0.860818	0.123258	-0.82377	1.00006
	nonadecanoate (19:0)	Long Chain Fatty Acid	Lipid	1.41313	2.00659	-1.41791	-0.0202119	-0.307319	1.99104
	arachidate (20:0)	Long Chain Fatty Acid	Lipid	1.56089	1.18361	-0.509001	-0.0776096	-0.099432	3.09673
	1-docosahexaenoyl-GPE (22:6)	Lysophospholipid	Lipid	-1.84443	0.55335	-0.444128	0.614758
	2-docosahexaenoyl-GPE (22:6)	Lysophospholipid	Lipid	-1.72204
	1-arachidonoyl-GPE (20:4n6)	Lysophospholipid	Lipid	-1.54315	0.428054	-0.448257	-0.517714
	1-arachidonoyl-GPC (20:4n6)	Lysophospholipid	Lipid	-1.26525	0.267965	0.561031	-0.850594
	2-arachidonoyl-GPE (20:4)	Lysophospholipid	Lipid	-0.885725		0.085465	-1.19888
	1-docosahexaenoyl-GPC (22:6)	Lysophospholipid	Lipid	-0.87356	0.756374	1.17504	0.171986
	1-palmitoyl-GPE (16:0)	Lysophospholipid	Lipid	-0.829377	0.558542	0.0541648	0.237922	1.42045	-1.2551
	1-palmitoleoyl-GPC (16:1)	Lysophospholipid	Lipid	-0.667408	1.23679	-0.590977	-0.403702
	2-palmitoyl-GPE (16:0)	Lysophospholipid	Lipid	-0.649873	0.426487	0.391952	0.20137
	1-stearoyl-GPE (18:0)	Lysophospholipid	Lipid	-0.589549	0.250824	0.566317	-0.161951	1.93002	-0.923199
	1-palmitoyl-GPC (16:0)	Lysophospholipid	Lipid	-0.584836	1.52134	-0.090463	-0.516555	1.57754	-0.423004
	1-docosapentaenoyl-GPC (22:5n6)	Lysophospholipid	Lipid	-0.581253	0.499744	-2.36551	-0.501514
	1-eicosapentaenoyl-GPC (20:5)	Lysophospholipid	Lipid	-0.398102	0.385072	0.513415	-0.114227
	1-myristoyl-GPC (14:0)	Lysophospholipid	Lipid	-0.337595	1.54456	-0.412591	0.147344	1.02063	-1.59096
	1-pentadecanoyl-GPC (15:0)	Lysophospholipid	Lipid	-0.281871	1.28627	-0.679427	0.0704952
	1-adrenoyl-GPC (22:4)	Lysophospholipid	Lipid	-0.250384	-0.0969946
	1-oleoyl-GPC (18:1)	Lysophospholipid	Lipid	-0.230952	0.939024	1.22358	0.200303	0.833652	0.901132
	2-oleoyl-GPE (18:1)	Lysophospholipid	Lipid	-0.140303	-0.908848	0.843909	0.379662
	2-palmitoleoyl-GPC (16:1)	Lysophospholipid	Lipid	-0.122787	1.00616
	1-dihomo-linolenoyl-GPE (20:3n3 or 6)	Lysophospholipid	Lipid	0.038467	0.699458	-0.486222	-0.153045
	1-margaroyl-GPC (17:0)	Lysophospholipid	Lipid	0.130597	1.78146
	1-oleoyl-GPE (18:1)	Lysophospholipid	Lipid	0.200072	-0.436483	1.09145	0.373341	1.18074	-0.134239
	2-arachidonoyl-GPC (20:4)	Lysophospholipid	Lipid	0.401323	0.734549	0.623884	-0.68425
	1-stearoyl-GPC (18:0)	Lysophospholipid	Lipid	0.416702	1.12434	0.473052	-0.437682	1.55942	1.0953
	2-palmitoyl-GPC (16:0)	Lysophospholipid	Lipid	0.52254	1.51615	-0.928963	-0.407233
	1-dihomo-linolenoyl-GPC (20:3n3 or 6)	Lysophospholipid	Lipid	0.608015	0.662177	0.195093	-0.46709
	1-margaroyl-GPE (17:0)	Lysophospholipid	Lipid	0.635531	0.775451
	1-docosapentaenoyl-GPC (22:5n3)	Lysophospholipid	Lipid	0.641376	-0.0689339	0.664152	-1.02971
	2-stearoyl-GPE (18:0)	Lysophospholipid	Lipid	0.692229	0.380482	0.644723	-0.279681
	1-lignoceroyl-GPC (24:0)	Lysophospholipid	Lipid	0.757827	0.451593			0.590972	1.05289
	1-eicosenoyl-GPC (20:1)	Lysophospholipid	Lipid	0.930918	0.876261	1.78605	0.546274
	2-oleoyl-GPC (18:1)	Lysophospholipid	Lipid	0.980402	1.5377	0.196299	1.62824
	2-linoleoyl-GPE (18:2)	Lysophospholipid	Lipid	1.001	-1.4556	-0.0284109	0.00271572
	1-linoleoyl-GPA (18:2)	Lysophospholipid	Lipid	1.16462	-0.0729954
	1-nonadecanoyl-GPC (19:0)	Lysophospholipid	Lipid	1.1879	1.53075	-1.78823	-0.0297067	2.0247	0.706951
	1-stearoyl-GPS (18:0)	Lysophospholipid	Lipid	1.25367
	1-linoleoyl-GPC (18:2)	Lysophospholipid	Lipid	1.3006	-0.770854			0.556343	0.625586
	1-linoleoyl-GPE (18:2)	Lysophospholipid	Lipid	1.3642	-0.882095	0.187207	-0.244422
	1-arachidoyl-GPC (20:0)	Lysophospholipid	Lipid	1.38677	-0.113785			1.21423	0.998801
	1-arachidonoyl-GPI (20:4)	Lysophospholipid	Lipid	1.43778	1.56914	0.57579	-0.6828
	1-linolenoyl-GPC (18:3)	Lysophospholipid	Lipid	1.49657	-0.216819	0.571001	-0.256975
	1-palmitoyl-GPA (16:0)	Lysophospholipid	Lipid	1.52795				-1.20548
	1-dihomo-linoleoyl-GPC (20:2)	Lysophospholipid	Lipid	1.76235	0.14829	0.784829	-0.249444
	1-oleoyl-GPI (18:1)	Lysophospholipid	Lipid	2.1492	1.1571	1.84465	0.76184
	1-palmitoyl-GPI (16:0)	Lysophospholipid	Lipid	2.18529	1.65385	1.28514	-0.105713
	2-stearoyl-GPI (18:0)	Lysophospholipid	Lipid	2.24893	1.05201
	2-linoleoyl-GPC (18:2)	Lysophospholipid	Lipid	2.32504	-0.441524	0.525101	-0.511751
	1-linoleoyl-GPI (18:2)	Lysophospholipid	Lipid	2.7536	0.641092	0.657001	-0.3513
	1-stearoyl-GPI (18:0)	Lysophospholipid	Lipid	2.98265	1.25974			0.510012	0.36748
	2-docosahexaenoyl-GPC (22:6)	Lysophospholipid	Lipid		1.44184
	1-eicosapentaenoyl-GPE (20:5)	Lysophospholipid	Lipid		0.0914735
	1-(1-enyl-palmitoyl)-GPC (P-16:0)	Lysoplasmalogen	Lipid	-0.772495	-0.327886
	1-(1-enyl-palmitoyl)-GPE (P-16:0)	Lysoplasmalogen	Lipid	-0.73254	-0.333181	1.31547	-0.379269
	1-(1-enyl-oleoyl)-GPE (P-18:1)	Lysoplasmalogen	Lipid	-0.260209	-0.466029	1.58332	0.418988
	1-palmityl-GPC (O-16:0)	Lysoplasmalogen	Lipid	0.193827	0.763944				-0.692132
	1-(1-enyl-oleoyl)-GPC (P-18:1)	Lysoplasmalogen	Lipid	0.257421
	1-stearyl-GPC (O-18:0)	Lysoplasmalogen	Lipid	0.344162	0.805643
	1-(1-enyl-stearoyl)-GPC (P-18:0)	Lysoplasmalogen	Lipid	0.664066	1.02142
	1-(1-enyl-stearoyl)-GPE (P-18:0)	Lysoplasmalogen	Lipid	0.808519	0.128403
	laurate (12:0)	Medium Chain Fatty Acid	Lipid	-0.989039	1.02374	1.07527	0.678979	-1.33303	-1.13694
	5-dodecenoate (12:1n7)	Medium Chain Fatty Acid	Lipid	-0.289625	1.05293			-1.68404	-0.598372
	10-undecenoate (11:1n1)	Medium Chain Fatty Acid	Lipid	-0.221321	0.871355	-0.649931	0.0280159	-1.03579	-0.864898
	caproate (6:0)	Medium Chain Fatty Acid	Lipid	0.0205343	-0.0168408			-1.14533	-0.185481
	heptanoate (7:0)	Medium Chain Fatty Acid	Lipid	0.787039	2.09325		-0.708415	-0.890164	0.385665
	caprylate (8:0)	Medium Chain Fatty Acid	Lipid	1.52368	0.00526649		1.06656	-0.670244	0.498886
	caprate (10:0)	Medium Chain Fatty Acid	Lipid	1.8836	0.312695	2.62866	0.85311	-1.55212	0.879743
	3-hydroxy-3-methylglutarate	Mevalonate Metabolism	Lipid	-0.622197	0.38034			0.253391	-1.42568
	1-pentadecanoylglycerol (15:0)	Monoacylglycerol	Lipid	1.35671				-1.15252
	2-oleoylglycerol (18:1)	Monoacylglycerol	Lipid	1.43083	1.81642			0.579222
	1-palmitoylglycerol (16:0)	Monoacylglycerol	Lipid	1.46206	0.625639			0.601959	-0.170619
	1-oleoylglycerol (18:1)	Monoacylglycerol	Lipid	1.47215	1.62141			1.5047	0.357548
	2-palmitoylglycerol (16:0)	Monoacylglycerol	Lipid	1.69023	0.569836
	1-dihomo-linolenylglycerol (20:3)	Monoacylglycerol	Lipid	2.28543
	1-linoleoylglycerol (18:2)	Monoacylglycerol	Lipid	3.82659	0.380335	1.01538	-0.552046	1.95399	1.71268
	1-margaroylglycerol (17:0)	Monoacylglycerol	Lipid		0.368496			-1.20971
	1-arachidonylglycerol (20:4)	Monoacylglycerol	Lipid		0.970888
	2-linoleoylglycerol (18:2)	Monoacylglycerol	Lipid					1.89879	2.35511
	1-linolenoylglycerol (18:3)	Monoacylglycerol	Lipid					1.91539
	1-palmitoyl-2-arachidonoyl-GPC (16:0/20:4n6)	Phosphatidylcholine (PC)	Lipid	-2.23449	0.37442			0.829583	-1.16367
	1-stearoyl-2-meadoyl-GPC (18:0/20:3n9)	Phosphatidylcholine (PC)	Lipid	-1.72822	2.19381
	1-palmitoyl-2-oleoyl-GPC (16:0/18:1)	Phosphatidylcholine (PC)	Lipid	-1.70172	0.97621			0.313717	-0.856073
	1-palmitoyl-2-docosahexaenoyl-GPC (16:0/22:6)	Phosphatidylcholine (PC)	Lipid	-1.44756	0.514501			0.178543	0.081486
	1-palmitoyl-2-palmitoleoyl-GPC (16:0/16:1)	Phosphatidylcholine (PC)	Lipid	-1.37034	1.41993
	1-pentadecanoyl-2-oleoyl-GPC (15:0/18:1)	Phosphatidylcholine (PC)	Lipid	-1.2928
	1-margaroyl-2-oleoyl-GPC (17:0/18:1)	Phosphatidylcholine (PC)	Lipid	-1.26327	2.20039
	1-stearoyl-2-arachidonoyl-GPC (18:0/20:4)	Phosphatidylcholine (PC)	Lipid	-1.25642	0.0153568			0.806262	-0.323964
	1-myristoyl-2-palmitoyl-GPC (14:0/16:0)	Phosphatidylcholine (PC)	Lipid	-1.10099	1.14443			0.125484	-2.05534
	1,2-dipalmitoyl-GPC (16:0/16:0)	Phosphatidylcholine (PC)	Lipid	-1.0879	-0.185446			1.18552	-1.17497
	1-stearoyl-2-docosapentaenoyl-GPC (18:0/22:5n6)	Phosphatidylcholine (PC)	Lipid	-1.08108	0.0210106
	phosphatidylcholine (18:0/20:5, 16:0/22:5n6)	Phosphatidylcholine (PC)	Lipid	-0.876256	0.456518
	1-stearoyl-2-docosahexaenoyl-GPC (18:0/22:6)	Phosphatidylcholine (PC)	Lipid	-0.870443	0.311675			0.192751	0.887816
	phosphatidylcholine (14:0/14:0, 16:0/12:0)	Phosphatidylcholine (PC)	Lipid	-0.868414	1.36273			-0.181241
	1-palmitoyl-2-eicosapentaenoyl-GPC (16:0/20:5)	Phosphatidylcholine (PC)	Lipid	-0.811279	0.754764
	1-linoleoyl-2-arachidonoyl-GPC (18:2/20:4n6)	Phosphatidylcholine (PC)	Lipid	-0.669913	-0.236227
	1-palmitoyl-2-meadoyl-GPC (16:0/20:3n9)	Phosphatidylcholine (PC)	Lipid	-0.533891	2.10592
	1-stearoyl-2-oleoyl-GPC (18:0/18:1)	Phosphatidylcholine (PC)	Lipid	-0.381134	1.16448			0.166114	-0.117814
	1-palmitoyl-2-stearoyl-GPC (16:0/18:0)	Phosphatidylcholine (PC)	Lipid	-0.214793	0.00615493			1.00799	-0.739707
	1-palmitoyl-2-adrenoyl-GPC (16:0/22:4)	Phosphatidylcholine (PC)	Lipid	-0.0146891	1.39427
	1-oleoyl-2-docosahexaenoyl-GPC (18:1/22:6)	Phosphatidylcholine (PC)	Lipid	-0.00339998	1.05505
	phosphatidylcholine (16:0/22:5n3, 18:1/20:4)	Phosphatidylcholine (PC)	Lipid	0.132196	0.0315857
	1-palmitoyl-2-linoleoyl-GPC (16:0/18:2)	Phosphatidylcholine (PC)	Lipid	0.223292	-0.12802			0.755356	-0.167525
	1,2-distearoyl-GPC (18:0/18:0)	Phosphatidylcholine (PC)	Lipid	0.45811	0.123189
	1-pentadecanoyl-2-linoleoyl-GPC (15:0/18:2)	Phosphatidylcholine (PC)	Lipid	0.468478	0.759261
	1-palmitoyl-2-dihomo-linolenoyl-GPC (16:0/20:3n3 or 6)	Phosphatidylcholine (PC)	Lipid	0.471917	0.704583
	1-palmitoleoyl-2-linoleoyl-GPC (16:1/18:2)	Phosphatidylcholine (PC)	Lipid	0.646982	1.02673
	1-myristoyl-2-linoleoyl-GPC (14:0/18:2)	Phosphatidylcholine (PC)	Lipid	0.733515	0.764155
	1-stearoyl-2-docosapentaenoyl-GPC (18:0/22:5n3)	Phosphatidylcholine (PC)	Lipid	0.879264	-0.483899
	1-stearoyl-2-dihomo-linolenoyl-GPC (18:0/20:3n3 or 6)	Phosphatidylcholine (PC)	Lipid	0.970683	0.825031
	1,2-dioleoyl-GPC (18:1/18:1)	Phosphatidylcholine (PC)	Lipid	1.0552	0.54449				0.941398
	1-margaroyl-2-linoleoyl-GPC (17:0/18:2)	Phosphatidylcholine (PC)	Lipid	1.31168	0.570011
	1-palmitoyl-2-alpha-linolenoyl-GPC (16:0/18:3n3)	Phosphatidylcholine (PC)	Lipid	1.42768	-0.704441
	1-stearoyl-2-linoleoyl-GPC (18:0/18:2)	Phosphatidylcholine (PC)	Lipid	1.81256	-0.486833
	1-oleoyl-2-dihomo-linolenoyl-GPC (18:1/20:3)	Phosphatidylcholine (PC)	Lipid	2.14949	1.52672
	1-oleoyl-2-linoleoyl-GPC (18:1/18:2)	Phosphatidylcholine (PC)	Lipid	2.23211	0.0925343
	1,2-dilinoleoyl-GPC (18:2/18:2)	Phosphatidylcholine (PC)	Lipid	2.23621	-1.10734			0.84617	0.0802056
	1-oleoyl-2-eicosapentaenoyl-GPC (18:1/20:5)	Phosphatidylcholine (PC)	Lipid		0.839601
	1-palmitoyl-2-docosahexaenoyl-GPE (16:0/22:6)	Phosphatidylethanolamine (PE)	Lipid	-1.68943	-0.0944707
	1-palmitoyl-2-arachidonoyl-GPE (16:0/20:4)	Phosphatidylethanolamine (PE)	Lipid	-1.4234	0.168367
	1-stearoyl-2-docosahexaenoyl-GPE (18:0/22:6)	Phosphatidylethanolamine (PE)	Lipid	-1.30543	-0.185253
	1-stearoyl-2-arachidonoyl-GPE (18:0/20:4)	Phosphatidylethanolamine (PE)	Lipid	-1.15393	-0.332478			1.07866	-1.91089
	1-palmitoyl-2-oleoyl-GPE (16:0/18:1)	Phosphatidylethanolamine (PE)	Lipid	-0.398639	0.100356			1.06579	-1.99566
	1-stearoyl-2-oleoyl-GPE (18:0/18:1)	Phosphatidylethanolamine (PE)	Lipid	-0.117838	-0.65269			1.18307	-1.15388
	1,2-dioleoyl-GPE (18:1/18:1)	Phosphatidylethanolamine (PE)	Lipid	0.413945	-0.871121			1.74504	-0.727744
	1-palmitoyl-2-dihomo-linolenoyl-GPE (16:0/20:3)	Phosphatidylethanolamine (PE)	Lipid	0.556337
	1-palmitoyl-2-linoleoyl-GPE (16:0/18:2)	Phosphatidylethanolamine (PE)	Lipid	0.923429	-0.302767			1.00145	-2.02812
	1-stearoyl-2-linoleoyl-GPE (18:0/18:2)	Phosphatidylethanolamine (PE)	Lipid	0.947952	-0.61717
	1-oleoyl-2-linoleoyl-GPE (18:1/18:2)	Phosphatidylethanolamine (PE)	Lipid	1.73689
	1-stearoyl-2-arachidonoyl-GPI (18:0/20:4)	Phosphatidylinositol (PI)	Lipid	-0.365431	0.359906			0.930056	-0.737909
	choline phosphate	Phospholipid Metabolism	Lipid	-1.644	-1.0604	1.06681	0.108159
	phosphoethanolamine	Phospholipid Metabolism	Lipid	-1.32168	-0.448248
	glycerophosphoethanolamine	Phospholipid Metabolism	Lipid	0.238157	-0.137518			1.63862	0.0893275
	choline	Phospholipid Metabolism	Lipid	0.354235	0.475434	0.910608	1.16362	0.365905	-1.54518
	glycerophosphoinositol	Phospholipid Metabolism	Lipid	0.574645
	glycerophosphorylcholine (GPC)	Phospholipid Metabolism	Lipid	0.621549	0.733498			0.91922	0.181808
	trimethylamine N-oxide	Phospholipid Metabolism	Lipid	2.83345	-0.331006			-0.371867	-1.42429
	cytidine 5'-diphosphocholine	Phospholipid Metabolism	Lipid
	1-(1-enyl-palmitoyl)-2-arachidonoyl-GPC (P-16:0/20:4)	Plasmalogen	Lipid	-2.88483	-0.664059
	1-(1-enyl-stearoyl)-2-docosahexaenoyl-GPE (P-18:0/22:6)	Plasmalogen	Lipid	-2.87083	-0.549469
	1-(1-enyl-palmitoyl)-2-docosahexaenoyl-GPC (P-16:0/22:6)	Plasmalogen	Lipid	-2.547	0.232906
	1-(1-enyl-stearoyl)-2-arachidonoyl-GPC (P-18:0/20:4)	Plasmalogen	Lipid	-2.16143	-1.05164			0.873307	-0.56217
	1-(1-enyl-palmitoyl)-2-docosahexaenoyl-GPE (P-16:0/22:6)	Plasmalogen	Lipid	-2.14421	-0.222366
	1-(1-enyl-stearoyl)-2-oleoyl-GPC (P-18:0/18:1)	Plasmalogen	Lipid	-1.93488	1.68474			1.8135	0.348604
	1-(1-enyl-stearoyl)-2-arachidonoyl-GPE (P-18:0/20:4)	Plasmalogen	Lipid	-1.85701	-0.808683
	1-(1-enyl-stearoyl)-2-docosahexaenoyl-GPC (P-18:0/22:6)	Plasmalogen	Lipid	-1.50227	-0.151192
	1-(1-enyl-palmitoyl)-2-arachidonoyl-GPE (P-16:0/20:4)	Plasmalogen	Lipid	-1.23257	-0.537756
	1-(1-enyl-palmitoyl)-2-oleoyl-GPC (P-16:0/18:1)	Plasmalogen	Lipid	-1.13257	0.822496
	1-(1-enyl-palmitoyl)-2-myristoyl-GPC (P-16:0/14:0)	Plasmalogen	Lipid	-1.05267	0.544431
	1-(1-enyl-stearoyl)-2-oleoyl-GPE (P-18:0/18:1)	Plasmalogen	Lipid	-0.790415	0.344204			-0.228464	-0.977347
	1-(1-enyl-palmitoyl)-2-palmitoyl-GPC (P-16:0/16:0)	Plasmalogen	Lipid	-0.672105	0.184041
	1-(1-enyl-stearoyl)-2-linoleoyl-GPC (P-18:0/18:2)	Plasmalogen	Lipid	-0.229161	-0.0636274
	1-(1-enyl-palmitoyl)-2-palmitoleoyl-GPC (P-16:0/16:1)	Plasmalogen	Lipid	-0.211188	0.0103333
	1-(1-enyl-palmitoyl)-2-linoleoyl-GPC (P-16:0/18:2)	Plasmalogen	Lipid	-0.1135	-0.517877
	1-(1-enyl-stearoyl)-2-linoleoyl-GPE (P-18:0/18:2)	Plasmalogen	Lipid	0.341747	0.506376
	1-palmityl-2-oleoyl-GPC (O-16:0/18:1)	Plasmalogen	Lipid	0.487723	1.09729
	1-(1-enyl-palmitoyl)-2-oleoyl-GPE (P-16:0/18:1)	Plasmalogen	Lipid	0.630143	1.63804
	1-(1-enyl-palmitoyl)-2-linoleoyl-GPE (P-16:0/18:2)	Plasmalogen	Lipid	1.32201	-0.636302
	docosadienoate (22:2n6)	Polyunsaturated Fatty Acid (n3 and n6)	Lipid	0.713175	1.13116			-0.344771	2.02044
	mead acid (20:3n9)	Polyunsaturated Fatty Acid (n3 and n6)	Lipid	0.715101	2.08674			0.308676
	adrenate (22:4n6)	Polyunsaturated Fatty Acid (n3 and n6)	Lipid	0.720974	0.917593			0.154234	0.786106
	stearidonate (18:4n3)	Polyunsaturated Fatty Acid (n3 and n6)	Lipid	0.723611	0.248628			0.945449	0.490898
	docosapentaenoate (n6 DPA; 22:5n6)	Polyunsaturated Fatty Acid (n3 and n6)	Lipid	1.03017	0.588201	-1.89408	0.293153	0.650816	-0.852488
	linoleate (18:2n6)	Polyunsaturated Fatty Acid (n3 and n6)	Lipid	1.0374	0.886698	-0.718416	0.0676491	0.135711	1.37694
	docosahexaenoate (DHA; 22:6n3)	Polyunsaturated Fatty Acid (n3 and n6)	Lipid	1.07688	1.21812			0.284292	1.45431
	linolenate [alpha or gamma; (18:3n3 or 6)]	Polyunsaturated Fatty Acid (n3 and n6)	Lipid	1.32116	0.259072
	docosapentaenoate (n3 DPA; 22:5n3)	Polyunsaturated Fatty Acid (n3 and n6)	Lipid	1.3261	0.90173
	dihomo-linoleate (20:2n6)	Polyunsaturated Fatty Acid (n3 and n6)	Lipid	1.42749	0.888128	-1.05559	0.434026
	eicosapentaenoate (EPA; 20:5n3)	Polyunsaturated Fatty Acid (n3 and n6)	Lipid	1.51788	0.341427	-0.785557	0.30111	0.725283	0.410495
	arachidonate (20:4n6)	Polyunsaturated Fatty Acid (n3 and n6)	Lipid	2.15344	1.05662	-0.790127	-0.284728	1.34665	0.573078
	dihomo-linolenate (20:3n3 or n6)	Polyunsaturated Fatty Acid (n3 and n6)	Lipid	3.02543	0.927441	-1.27916	0.240843
	docosatrienoate (22:3n3)	Polyunsaturated Fatty Acid (n3 and n6)	Lipid		1.64199			0.284741	0.465207
	pregnenolone sulfate	Pregnenolone Steroids	Lipid	0.883158	0.243385			0.207031	0.170068
	21-hydroxypregnenolone disulfate	Pregnenolone Steroids	Lipid	1.10852	-0.240813	-0.0598091	-0.698626	0.0180165	0.400227
	chenodeoxycholate	Primary Bile Acid Metabolism	Lipid	-2.0347	1.10126			-0.783893	-0.992154
	glycochenodeoxycholate sulfate	Primary Bile Acid Metabolism	Lipid	-1.67229	1.39485			0.100378	-1.0212
	glycocholate	Primary Bile Acid Metabolism	Lipid	-1.47381	0.504783	0.128666	-0.941883	1.02939	-1.49651
	cholate	Primary Bile Acid Metabolism	Lipid	-1.38022	0.105031	-0.0686058	-0.546401	0.592668	-1.40797
	glycochenodeoxycholate	Primary Bile Acid Metabolism	Lipid	-1.24707	1.5596	0.755529	-0.502912	0.823765	-0.921208
	taurocholate	Primary Bile Acid Metabolism	Lipid	-0.516524	0.456243	0.915131	-0.104122	0.309387	-0.955455
	glycochenodeoxycholate glucuronide (1)	Primary Bile Acid Metabolism	Lipid	-0.464478	0.084488			-0.282245	-0.20036
	taurochenodeoxycholate	Primary Bile Acid Metabolism	Lipid	-0.311763	1.25873	1.70463	0.109417	0.231732	-0.460856
	tauro-beta-muricholate	Primary Bile Acid Metabolism	Lipid	0.357774				-1.00342	-0.392073
	5alpha-pregnan-3(alpha or beta),20beta-diol disulfate	Progestin Steroids	Lipid	0.913436
	5alpha-pregnan-3beta,20beta-diol monosulfate (1)	Progestin Steroids	Lipid	0.923972					0.812965
	5alpha-pregnan-3beta,20alpha-diol monosulfate (2)	Progestin Steroids	Lipid	0.924878					0.390068
	pregnen-diol disulfate C21H34O8S2	Progestin Steroids	Lipid	1.14199	0.0511147
	5alpha-pregnan-3beta,20alpha-diol disulfate	Progestin Steroids	Lipid	1.17006	-0.922044	-0.00127092	-0.0963712	0.316323	0.604976
	pregn steroid monosulfate C21H34O5S	Progestin Steroids	Lipid	1.40337	0.289004
	hyocholate	Secondary Bile Acid Metabolism	Lipid	-1.62638	1.99134			-0.273888	-0.568831
	glycohyocholate	Secondary Bile Acid Metabolism	Lipid	-1.56984	1.63528	0.804329	-0.216871	-0.0859888	-0.997698
	glycocholenate sulfate	Secondary Bile Acid Metabolism	Lipid	-1.25423	0.0948535	1.02436	0.697286
	deoxycholate	Secondary Bile Acid Metabolism	Lipid	-0.830179	-1.08754				0.0141298
	ursodeoxycholate	Secondary Bile Acid Metabolism	Lipid	-0.446215	0.0491493	1.83263	0.966773	-1.65054
	glycodeoxycholate	Secondary Bile Acid Metabolism	Lipid	-0.396526					0.152643
	glycolithocholate sulfate	Secondary Bile Acid Metabolism	Lipid	-0.184987	-1.51903
	taurocholenate sulfate	Secondary Bile Acid Metabolism	Lipid	-0.11719	0.132847			-0.556159
	glycoursodeoxycholate	Secondary Bile Acid Metabolism	Lipid	-0.100452	0.53918	1.39713	0.486103	0.384025	-1.3836
	taurodeoxycholate	Secondary Bile Acid Metabolism	Lipid	0.378599	0.592037		0.17358		0.4735
	taurolithocholate 3-sulfate	Secondary Bile Acid Metabolism	Lipid	0.440801				-0.500527	0.968117
	tauroursodeoxycholate	Secondary Bile Acid Metabolism	Lipid	0.491054	0.662373			-0.19045
	sphingomyelin (d18:1/18:1, d18:2/18:0)	Sphingolipid Metabolism	Lipid	-2.3496	-0.837763			-0.326285	-0.668967
	sphinganine-1-phosphate	Sphingolipid Metabolism	Lipid	-1.67705	0.553862			1.13799	-1.09874
	palmitoyl sphingomyelin (d18:1/16:0)	Sphingolipid Metabolism	Lipid	-1.451	0.206932			0.670865	0.41338
	sphingosine 1-phosphate	Sphingolipid Metabolism	Lipid	-1.40935	0.924175			1.22535	-1.53483
	sphinganine	Sphingolipid Metabolism	Lipid	-1.3951	0.608323			2.00066	-1.22669
	sphingosine	Sphingolipid Metabolism	Lipid	-1.1718	0.567986	1.08795	-1.18923	2.56075	-1.69467
	sphingomyelin (d18:2/14:0, d18:1/14:1)	Sphingolipid Metabolism	Lipid	-1.04921	0.296247
	sphingomyelin (d18:1/20:1, d18:2/20:0)	Sphingolipid Metabolism	Lipid	-1.02881	-1.14414
	sphingomyelin (d18:2/16:0, d18:1/16:1)	Sphingolipid Metabolism	Lipid	-0.999431	-0.65277		-2.10172
	stearoyl sphingomyelin (d18:1/18:0)	Sphingolipid Metabolism	Lipid	-0.768713	0.210995		0.325505		-0.322827
	sphingomyelin (d18:2/23:0, d18:1/23:1, d17:1/24:1)	Sphingolipid Metabolism	Lipid	-0.40561	1.1457
	sphingomyelin (d18:1/17:0, d17:1/18:0, d19:1/16:0)	Sphingolipid Metabolism	Lipid	-0.281873	0.904768			-0.27625	-0.250043
	sphingomyelin (d18:1/14:0, d16:1/16:0)	Sphingolipid Metabolism	Lipid	-0.211221	0.776003
	palmitoyl dihydrosphingomyelin (d18:0/16:0)	Sphingolipid Metabolism	Lipid	-0.159854	0.846573
	sphingomyelin (d18:1/22:1, d18:2/22:0, d16:1/24:1)	Sphingolipid Metabolism	Lipid	-0.09097	-0.538547
	sphingomyelin (d17:1/16:0, d18:1/15:0, d16:1/17:0)	Sphingolipid Metabolism	Lipid	-0.0273105	1.10308
	sphingomyelin (d18:1/24:1, d18:2/24:0)	Sphingolipid Metabolism	Lipid	0.145441	0.763594
	sphingomyelin (d18:1/21:0, d17:1/22:0, d16:1/23:0)	Sphingolipid Metabolism	Lipid	0.186203	1.0838
	behenoyl sphingomyelin (d18:1/22:0)	Sphingolipid Metabolism	Lipid	0.192459	0.455014
	sphingomyelin (d18:2/24:1, d18:1/24:2)	Sphingolipid Metabolism	Lipid	0.433866	-0.730455
	sphingomyelin (d18:1/20:0, d16:1/22:0)	Sphingolipid Metabolism	Lipid	0.510394	0.6426
	tricosanoyl sphingomyelin (d18:1/23:0)	Sphingolipid Metabolism	Lipid
	7-alpha-hydroxy-3-oxo-4-cholestenoate (7-Hoca)	Sterol	Lipid	-0.876299	-0.205609	-0.474514	-0.427328
	cholesterol	Sterol	Lipid	-0.0122779	0.884345	0.582812	-0.235392	-0.324123	-0.223622
	campesterol	Sterol	Lipid	1.19368	-1.504			1.03148	-0.241788
	7-hydroxycholesterol (alpha or beta)	Sterol	Lipid					-0.920043
	allantoin	Purine Metabolism, (Hypo)Xanthine/Inosine containing	Nucleotide	-2.8212	0.922227		0.577048	-0.153875	-0.778132
	urate	Purine Metabolism, (Hypo)Xanthine/Inosine containing	Nucleotide	0.186767	-0.616634	-0.719119	-0.313275	-0.583135	-0.846266
	xanthine	Purine Metabolism, (Hypo)Xanthine/Inosine containing	Nucleotide	0.672815	1.26265		0.719524	0.864538	-0.116451
	hypoxanthine	Purine Metabolism, (Hypo)Xanthine/Inosine containing	Nucleotide	0.700032	1.70546		1.04701	1.08776	-0.614764
	inosine	Purine Metabolism, (Hypo)Xanthine/Inosine containing	Nucleotide	2.90093	0.923841	-0.371336	0.247822	1.27406	-0.541143
	inosine 5'-monophosphate (IMP)	Purine Metabolism, (Hypo)Xanthine/Inosine containing	Nucleotide		0.154358			1.51538
	adenosine 5'-monophosphate (AMP)	Purine Metabolism, Adenine containing	Nucleotide	-4.36796	0.856384	1.15743	0.632641
	N1-methyladenosine	Purine Metabolism, Adenine containing	Nucleotide	-1.57647	0.301756	-0.25351	-0.904878
	N6-carbamoylthreonyladenosine	Purine Metabolism, Adenine containing	Nucleotide	-0.464751	1.44765
	adenine	Purine Metabolism, Adenine containing	Nucleotide	-0.388811	0.796222	1.95195	-0.716811	0.0694212	-0.616494
	N6-succinyladenosine	Purine Metabolism, Adenine containing	Nucleotide	-0.282362	-0.194513			-0.0565522	0.636402
	adenosine 3',5'-cyclic monophosphate (cAMP)	Purine Metabolism, Adenine containing	Nucleotide				0.463953	0.921281
	adenosine 5'-diphosphate (ADP)	Purine Metabolism, Adenine containing	Nucleotide		0.416412
	N2,N2-dimethylguanosine	Purine Metabolism, Guanine containing	Nucleotide	-1.15635	0.851567			-0.456011	-1.17238
	7-methylguanine	Purine Metabolism, Guanine containing	Nucleotide	-0.578526	0.74077	0.433285	0.664798	-0.456086	-1.04064
	cytidine	Pyrimidine Metabolism, Cytidine containing	Nucleotide	0.274936
	N4-acetylcytidine	Pyrimidine Metabolism, Cytidine containing	Nucleotide	0.359589	-0.37121				-1.82129
	cytidine 5'-monophosphate (5'-CMP)	Pyrimidine Metabolism, Cytidine containing	Nucleotide	0.737859
	orotate	Pyrimidine Metabolism, Orotate containing	Nucleotide	0.0733707	1.36803	-0.488812	0.13038	1.21096	-0.846675
	orotidine	Pyrimidine Metabolism, Orotate containing	Nucleotide	0.350546	0.207609			0.596164	-0.748487
	N-carbamoylaspartate	Pyrimidine Metabolism, Orotate containing	Nucleotide	0.435735
	3-aminoisobutyrate	Pyrimidine Metabolism, Thymine containing	Nucleotide	-0.649184	1.36326			-0.261795	-0.278454
	5,6-dihydrothymine	Pyrimidine Metabolism, Thymine containing	Nucleotide	0.461634	1.25517	0.372443	-0.26361	0.732487	-0.808695
	beta-alanine	Pyrimidine Metabolism, Uracil containing	Nucleotide	-0.944069	0.960562			1.23543	-0.456027
	uridine	Pyrimidine Metabolism, Uracil containing	Nucleotide	-0.804245	0.799789	-1.34375	-0.526219	0.312249	0.0347383
	N-acetyl-beta-alanine	Pyrimidine Metabolism, Uracil containing	Nucleotide	-0.706115	0.858697		0.107954	-0.431263	-1.97614
	pseudouridine	Pyrimidine Metabolism, Uracil containing	Nucleotide	-0.482786	0.34873		-0.478867	-0.430314	-1.07456
	3-ureidopropionate	Pyrimidine Metabolism, Uracil containing	Nucleotide	-0.0612166	1.3407			-0.293798	-0.891383
	5-methyluridine (ribothymidine)	Pyrimidine Metabolism, Uracil containing	Nucleotide	0.0530046	-0.982629	-0.876026	0.0274767	-0.527604	-1.27979
	uracil	Pyrimidine Metabolism, Uracil containing	Nucleotide		-0.76286	0.57712	0.422945	1.25944	-0.517151
	5,6-dihydrouracil	Pyrimidine Metabolism, Uracil containing	Nucleotide		0.924082			1.28561	0.612797
	2'-deoxyuridine	Pyrimidine Metabolism, Uracil containing	Nucleotide				0.122553
	phenylacetylglycine	Acetylated Peptides	Peptide	-0.18766
	phenylacetylglutamine	Acetylated Peptides	Peptide	0.281269	0.697393			0.476901	-0.393442
	phenylacetylcarnitine	Acetylated Peptides	Peptide	1.18069	0.68634			0.145689	-0.218699
	isoleucylleucine/leucylisoleucine	Dipeptide	Peptide	-0.356875	-0.363203			-0.498244
	prolylglycine	Dipeptide	Peptide	-0.167888	-1.30405			0.00488645
	pyroglutamylvaline	Dipeptide	Peptide	-0.11747	-0.397281			0.215246
	isoleucylglycine	Dipeptide	Peptide	0.481997	-0.625462
	valylglycine	Dipeptide	Peptide	0.591475	-0.952745			0.24378
	prolylserine	Dipeptide	Peptide	0.623942	-0.576866
	pyroglutamylglutamine	Dipeptide	Peptide	0.726936				-1.04414
	leucylglycine	Dipeptide	Peptide	0.736518				-1.29146
	phenylalanylphenylalanine	Dipeptide	Peptide	1.13651				0.0928849
	phenylalanyltryptophan	Dipeptide	Peptide	1.84981	1.23389			-1.20344
	leucylleucine	Dipeptide	Peptide	1.93796	-0.24289			1.69955
	glycylphenylalanine	Dipeptide	Peptide	3.2675				0.3001
	prolylvaline	Dipeptide	Peptide					-0.661626
	tryptophylleucine	Dipeptide	Peptide					1.03842
	phenylalanylalanine	Dipeptide	Peptide					-0.935353
	N-acetylcarnosine	Dipeptide Derivative	Peptide	0.525731	-1.10443			0.194829	-0.666604
	DSGEGDFXAEGGGVR	Fibrinogen Cleavage Peptide	Peptide
	gamma-glutamylalanine	Gamma-glutamyl Amino Acid	Peptide	-0.650397	-1.78896
	gamma-glutamylmethionine	Gamma-glutamyl Amino Acid	Peptide	-0.403989	-0.881567			-0.788624
	gamma-glutamylvaline	Gamma-glutamyl Amino Acid	Peptide	-0.13506	-1.7466			-0.334
	gamma-glutamylhistidine	Gamma-glutamyl Amino Acid	Peptide	-0.105089	-0.650245			-0.355503
	gamma-glutamylisoleucine	Gamma-glutamyl Amino Acid	Peptide	0.0927698	-0.313113
	gamma-glutamylglycine	Gamma-glutamyl Amino Acid	Peptide	0.431455	-1.26319			1.51172
	gamma-glutamyltyrosine	Gamma-glutamyl Amino Acid	Peptide	0.505851	-1.14688			0.46076
	gamma-glutamylglutamate	Gamma-glutamyl Amino Acid	Peptide	0.556492	-0.575579			-1.4385
	gamma-glutamylglutamine	Gamma-glutamyl Amino Acid	Peptide	0.690014	-0.589968			0.123769
	gamma-glutamyl-epsilon-lysine	Gamma-glutamyl Amino Acid	Peptide	0.950833	-0.328458			-0.435992
	gamma-glutamylthreonine	Gamma-glutamyl Amino Acid	Peptide	0.980173	-0.708033			-0.857473
	gamma-glutamylphenylalanine	Gamma-glutamyl Amino Acid	Peptide	1.4169				0.332215	0.0191135
	gamma-glutamylleucine	Gamma-glutamyl Amino Acid	Peptide	1.70068	-0.552954			-0.254126
	tartronate (hydroxymalonate)	Bacterial/Fungal	Xenobiotics	-0.129979	0.0183137			-0.133989	0.671735
	hippurate	Benzoate Metabolism	Xenobiotics	-1.80801	0.0142522			0.760263	-2.54629
	4-vinylphenol sulfate	Benzoate Metabolism	Xenobiotics	-1.04182	0.212879	0.437257	0.0267027	1.23236	-0.599112
	3-methoxycatechol sulfate (1)	Benzoate Metabolism	Xenobiotics	-0.951402	1.02355			0.372976	-1.33833
	3-hydroxyhippurate	Benzoate Metabolism	Xenobiotics	-0.942332	0.271868	-0.143787	0.358347	0.033897
	3-(3-hydroxyphenyl)propionate	Benzoate Metabolism	Xenobiotics	-0.663694	0.0182654	0.0347575	0.215739	0.162021
	4-ethylphenylsulfate	Benzoate Metabolism	Xenobiotics	-0.514359	-0.0113468	-1.07008	-0.173906
	4-hydroxyhippurate	Benzoate Metabolism	Xenobiotics	0.232611	0.80371	0.5099	-0.210712	-0.32153	-1.04295
	p-cresol sulfate	Benzoate Metabolism	Xenobiotics	0.706701	-0.113082			0.851488	0.367218
	propyl 4-hydroxybenzoate sulfate	Benzoate Metabolism	Xenobiotics	0.791357	1.28252			-0.964814
	methyl-4-hydroxybenzoate sulfate	Benzoate Metabolism	Xenobiotics	0.883547	1.14155			-1.55148	0.110364
	4-methylcatechol sulfate	Benzoate Metabolism	Xenobiotics	0.933286	0.223376	0.484034	1.15389	0.484858	-0.255528
	catechol sulfate	Benzoate Metabolism	Xenobiotics	1.58435	-0.293029	0.394398	0.777748	0.217565	0.322369
	O-methylcatechol sulfate	Benzoate Metabolism	Xenobiotics	1.90115	-0.396099	0.407672	1.06365	0.243887
	3-methyl catechol sulfate (1)	Benzoate Metabolism	Xenobiotics		0.0944072	-0.0352995	0.604279	1.37524	-0.743578
	2-hydroxyhippurate (salicylurate)	Benzoate Metabolism	Xenobiotics				0.255203	0.0152886
	3-phenylpropionate (hydrocinnamate)	Benzoate Metabolism	Xenobiotics		0.614517			0.8358	-0.707172
	o-cresol sulfate	Benzoate Metabolism	Xenobiotics					-0.663694
	iminodiacetate (IDA)	Chemical	Xenobiotics	-12.9613	0.533201			-2.59949	-1.73345
	4-hydroxychlorothalonil	Chemical	Xenobiotics	-1.15095	0.238744			1.30197	-1.06866
	2-aminophenol sulfate	Chemical	Xenobiotics	-0.95353	-0.230964	0.150281	0.755806	1.65259
	3-hydroxypyridine sulfate	Chemical	Xenobiotics	-0.0728477	-0.056777			0.99491
	O-sulfo-L-tyrosine	Chemical	Xenobiotics	0.213286	-1.32803	-0.526117	-1.29117	-0.160263	-0.407226
	succinimide	Chemical	Xenobiotics	0.621378	3.82812			1.80346	2.01665
	6-hydroxyindole sulfate	Chemical	Xenobiotics	0.717121	1.10868			0.714688	-0.758275
	N-methylpipecolate	Chemical	Xenobiotics	1.75408	-0.297613			0.270898	1.07963
	ethyl paraben sulfate	Chemical	Xenobiotics	1.94232	0.340876
	sulfate	Chemical	Xenobiotics	2.07354	0.0757618
	EDTA	Chemical	Xenobiotics		-0.538337			-0.391567	-1.14901
	1,2,3-benzenetriol sulfate (2)	Chemical	Xenobiotics		1.35276			0.600477	-0.530361
	hydroquinone sulfate	Drug	Xenobiotics		1.6964			0.655105
	4-acetylphenol sulfate	Drug	Xenobiotics		-0.170496
	4-acetaminophen sulfate	Drug	Xenobiotics					-0.458684
	salicylate	Drug	Xenobiotics					-0.0261606
	stachydrine	Food Component/Plant	Xenobiotics	-1.54371	-0.96565			0.0993328	-1.33918
	2-piperidinone	Food Component/Plant	Xenobiotics	-1.08597	0.566099			-1.06132	0.822181
	2,3-dihydroxyisovalerate	Food Component/Plant	Xenobiotics	-1.07629	0.542331	-0.372083	-0.907826	0.0913974	-0.727895
	erythritol	Food Component/Plant	Xenobiotics	-0.794364	0.325135			1.45001	-0.637519
	tartarate	Food Component/Plant	Xenobiotics	-0.315147	0.135858			-1.33436	-0.0769481
	pyrraline	Food Component/Plant	Xenobiotics	-0.15389	-0.331812			0.899101	0.0863703
	2-isopropylmalate	Food Component/Plant	Xenobiotics	-0.111194	0.907908			0.718393
	saccharin	Food Component/Plant	Xenobiotics	0.306139				0.477791
	4-allylphenol sulfate	Food Component/Plant	Xenobiotics	0.332723	1.03996	1.47507	0.671012	1.19594	-0.620676
	gluconate	Food Component/Plant	Xenobiotics	0.348493	0.32905	0.616272	-0.972396	1.24219	1.8529
	N-(2-furoyl)glycine	Food Component/Plant	Xenobiotics	0.863212	-1.0891			1.35543
	ergothioneine	Food Component/Plant	Xenobiotics			-2.34945	-0.598016
	eugenol sulfate	Food Component/Plant	Xenobiotics		1.53784			-0.32888
	methyl glucopyranoside (alpha + beta)	Food Component/Plant	Xenobiotics		1.24326	1.74678	0.772683	0.352507	-0.524411
	piperine	Food Component/Plant	Xenobiotics		-0.639245			-1.21638
	S-allylcysteine	Food Component/Plant	Xenobiotics					-0.771376
	thymol sulfate	Food Component/Plant	Xenobiotics		0.47442			-1.08414	-0.790089
	quinate	Food Component/Plant	Xenobiotics		0.839619			0.955783
	4-vinylguaiacol sulfate	Food Component/Plant	Xenobiotics		0.3732			2.04492
	cinnamoylglycine	Food Component/Plant	Xenobiotics		0.72116			0.829661
	phytanate	Food Component/Plant	Xenobiotics						0.546576
	ferulic acid 4-sulfate	Food Component/Plant	Xenobiotics		-0.206746			1.11607
	dihydroferulic acid	Food Component/Plant	Xenobiotics		1.11921			-1.11175
	betonicine	Food Component/Plant	Xenobiotics		0.639747			-0.146236
	homostachydrine	Food Component/Plant	Xenobiotics		-0.249871
	theobromine	Xanthine Metabolism	Xenobiotics	-0.954241				0.212944
	paraxanthine	Xanthine Metabolism	Xenobiotics	0.456975
	1-methylurate	Xanthine Metabolism	Xenobiotics		-0.171943			-0.209316
	3-methylxanthine	Xanthine Metabolism	Xenobiotics					-0.737479
	caffeine	Xanthine Metabolism	Xenobiotics					-0.843931
